# Supplementary material
Source: bioRxiv or medRxiv preprint supplement (https://www.biorxiv.org/highwire/filestream/30790/field_highwire_adjunct_files/4/105064-5.pdf)
Supplement: Supplementary file [file 105064-5.pdf]

**Figure 1**

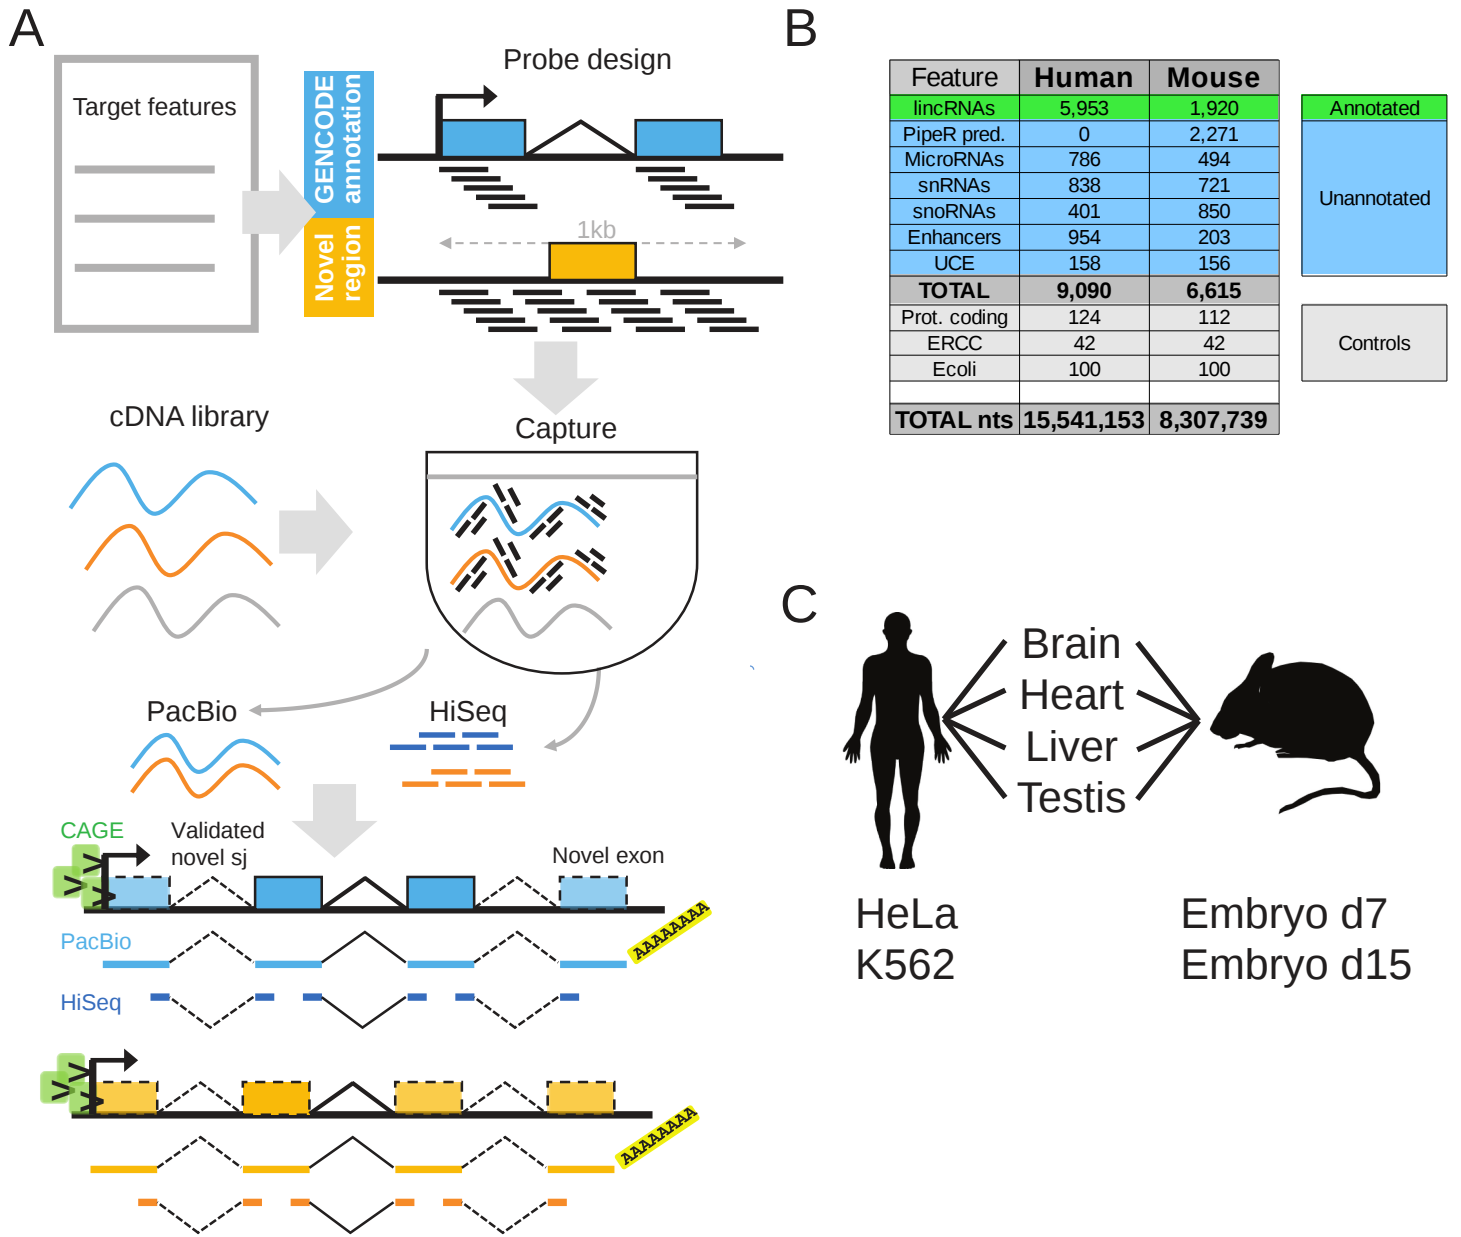

# Figure 2

## A

| Human     |                 | Mouse     |
|-----------|-----------------|-----------|
| 64        | SMRT Cells      | 66        |
| 2,397,192 | ROI Reads       | 2,137,176 |
| 2,383,470 | Mapped          | 2,132,978 |
| 2,053,424 | Uniquely mapped | 1,870,681 |
| 1,627,322 | Demultiplexed   | 1,509,374 |

## B

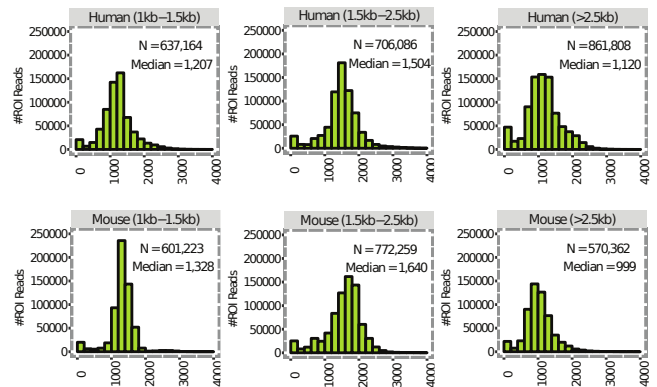

## C

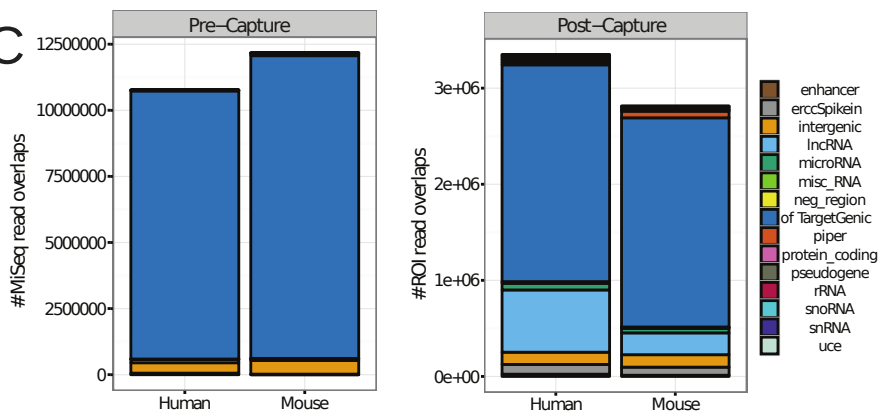

## D

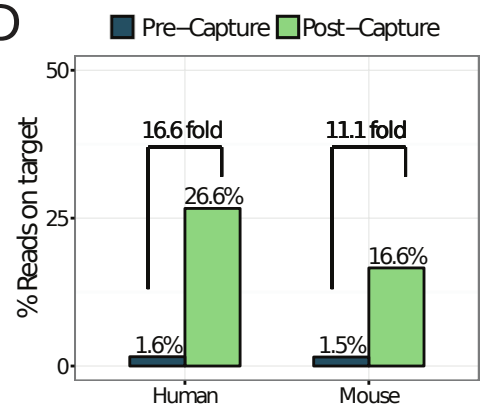

## E

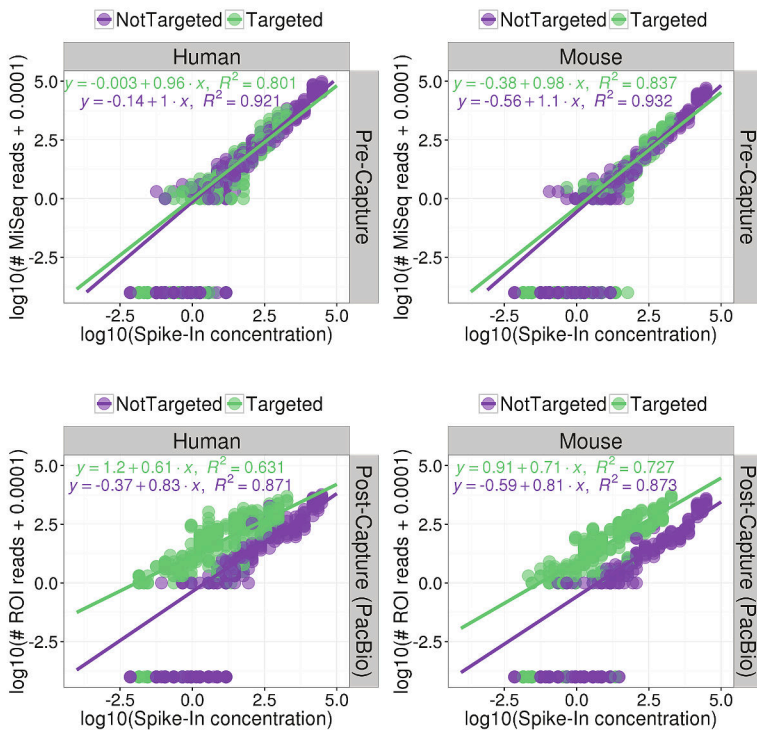

**Figure 3**

**A**

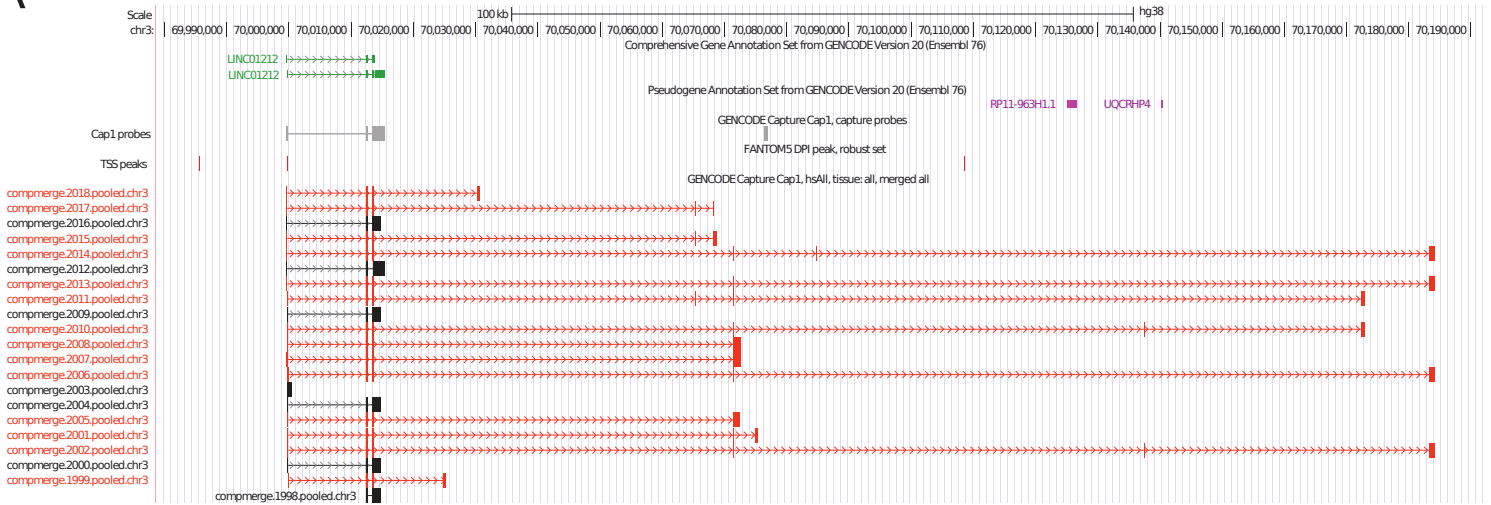

**B**

**Novel vs Annotated Splice Junctions (hs)**

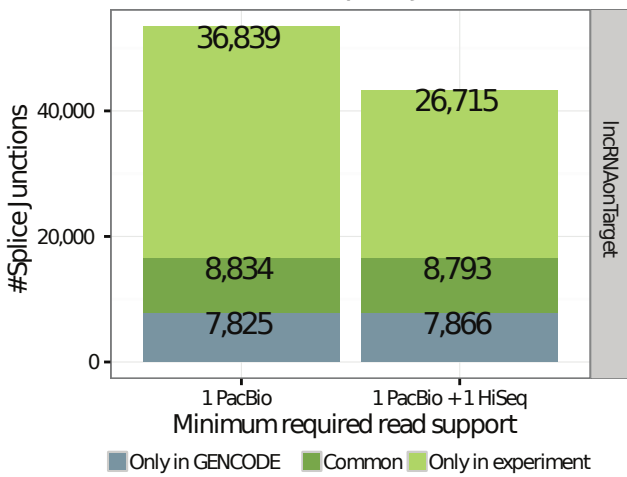

**C**

**hs splice site scores**

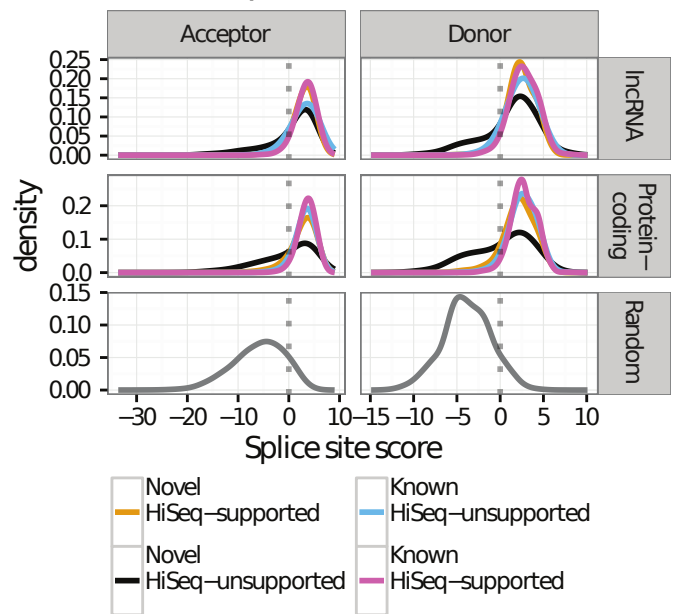

**D**

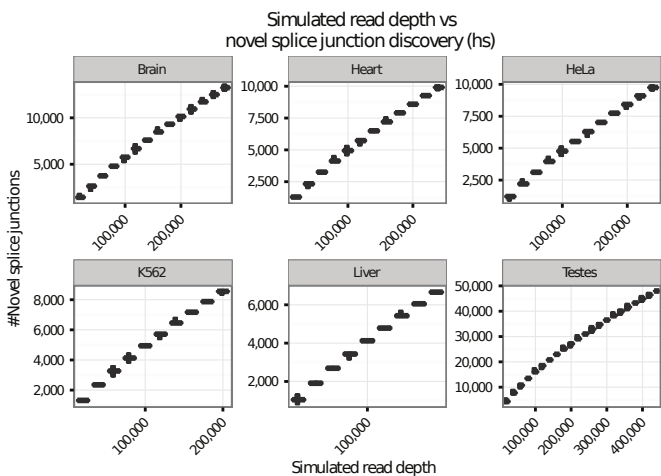

**E**

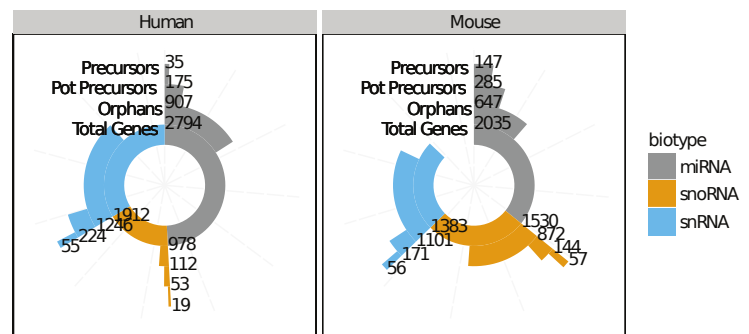

# Figure 4

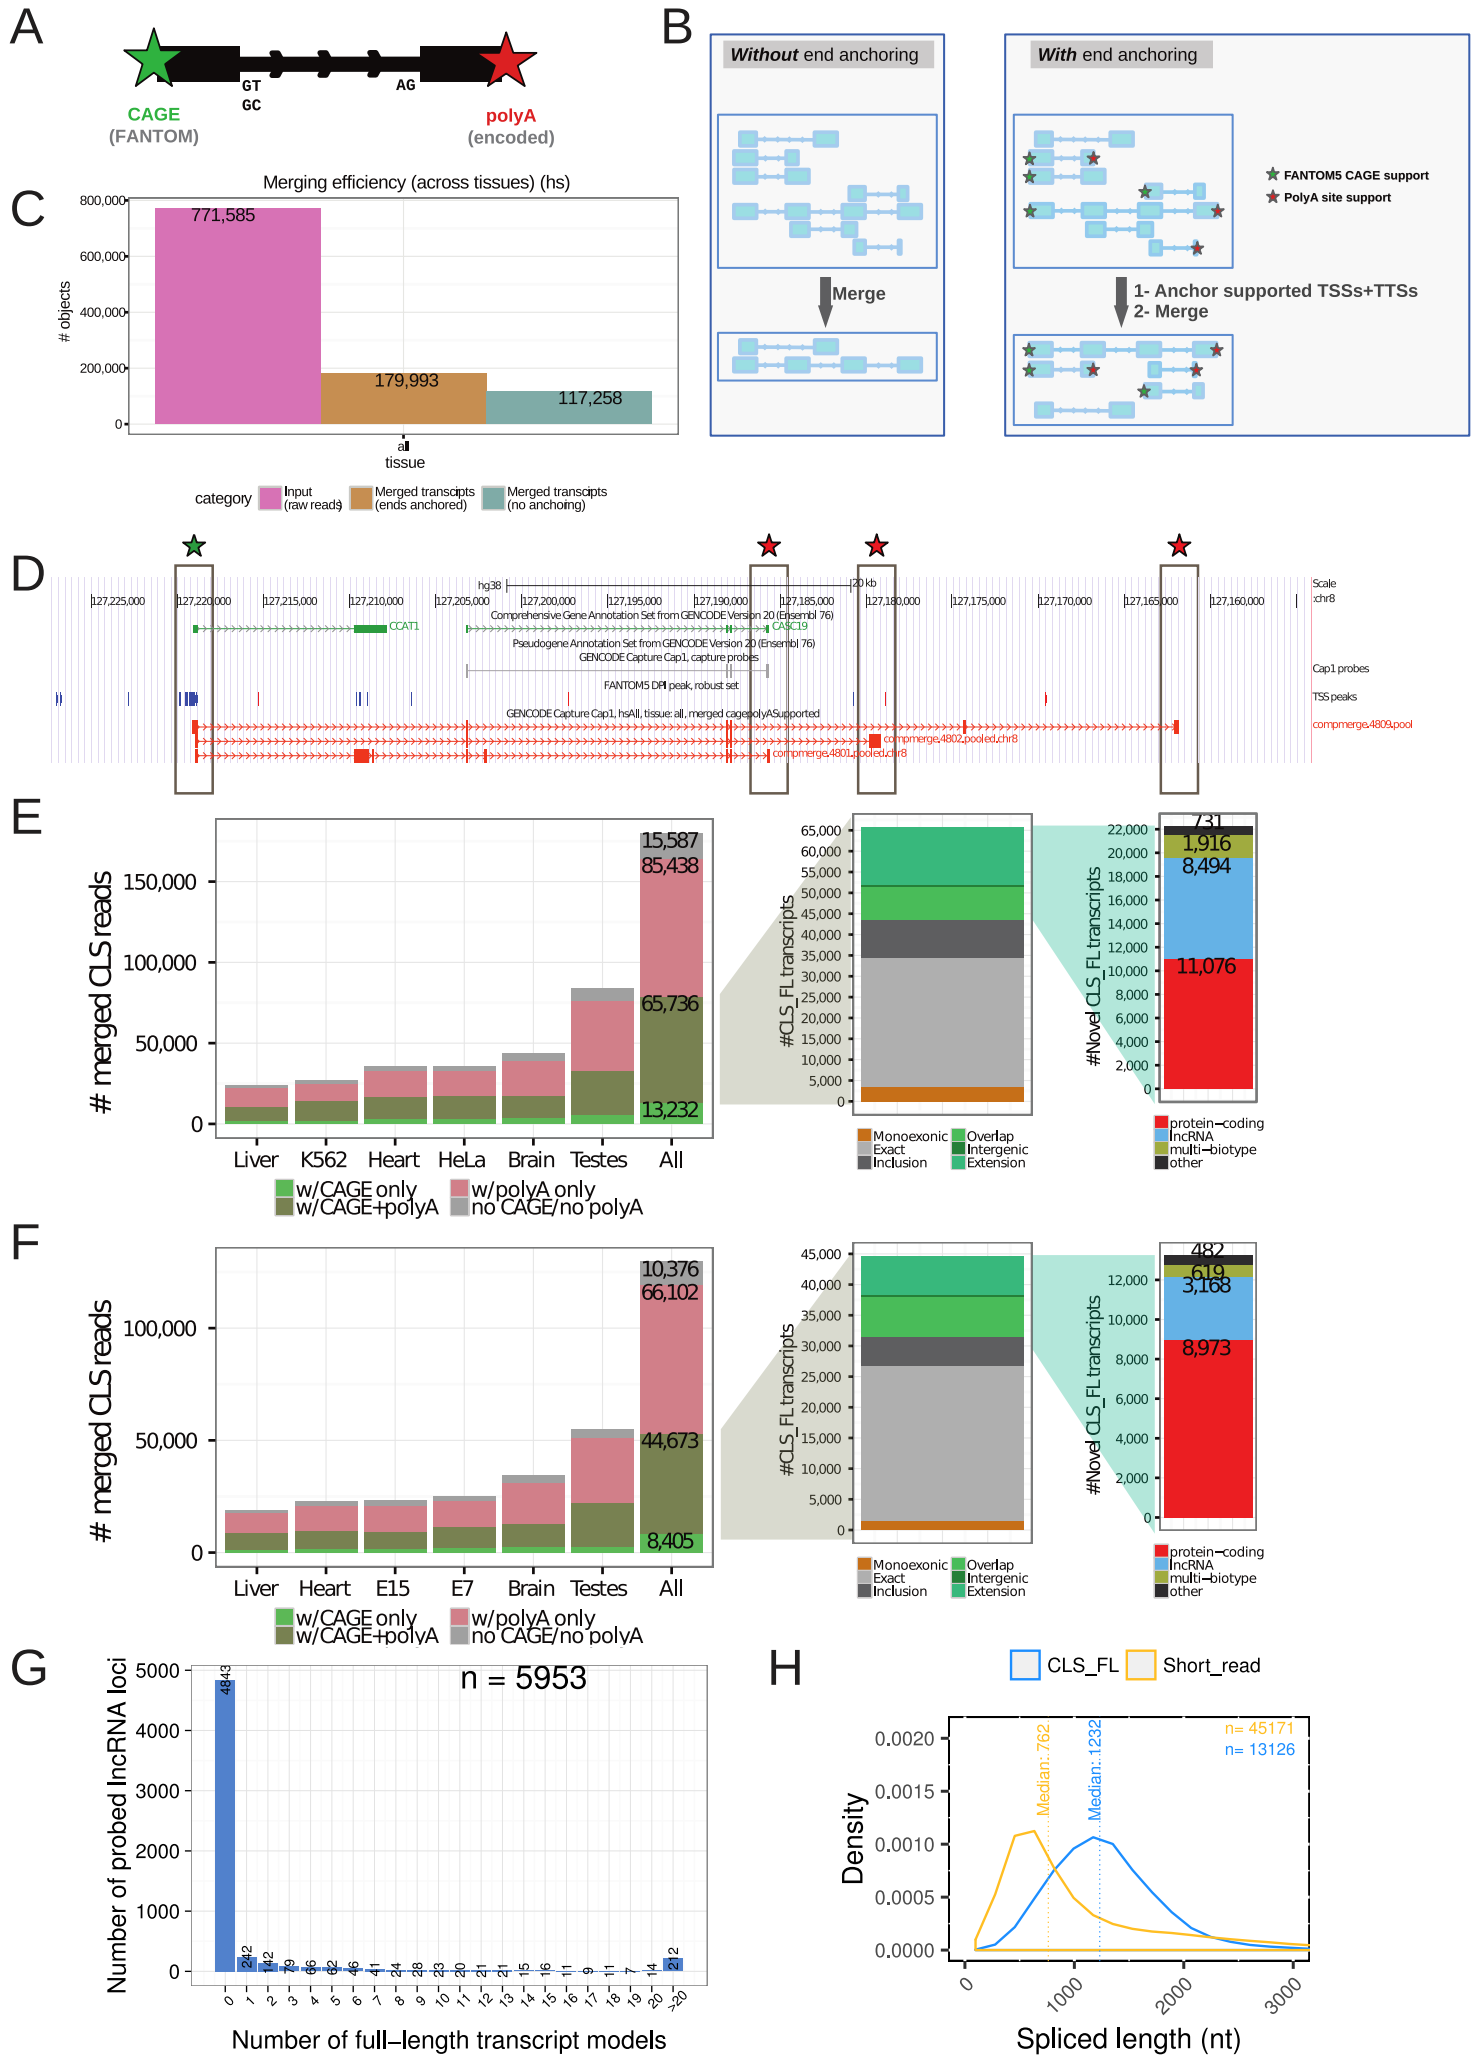

**Figure 5**

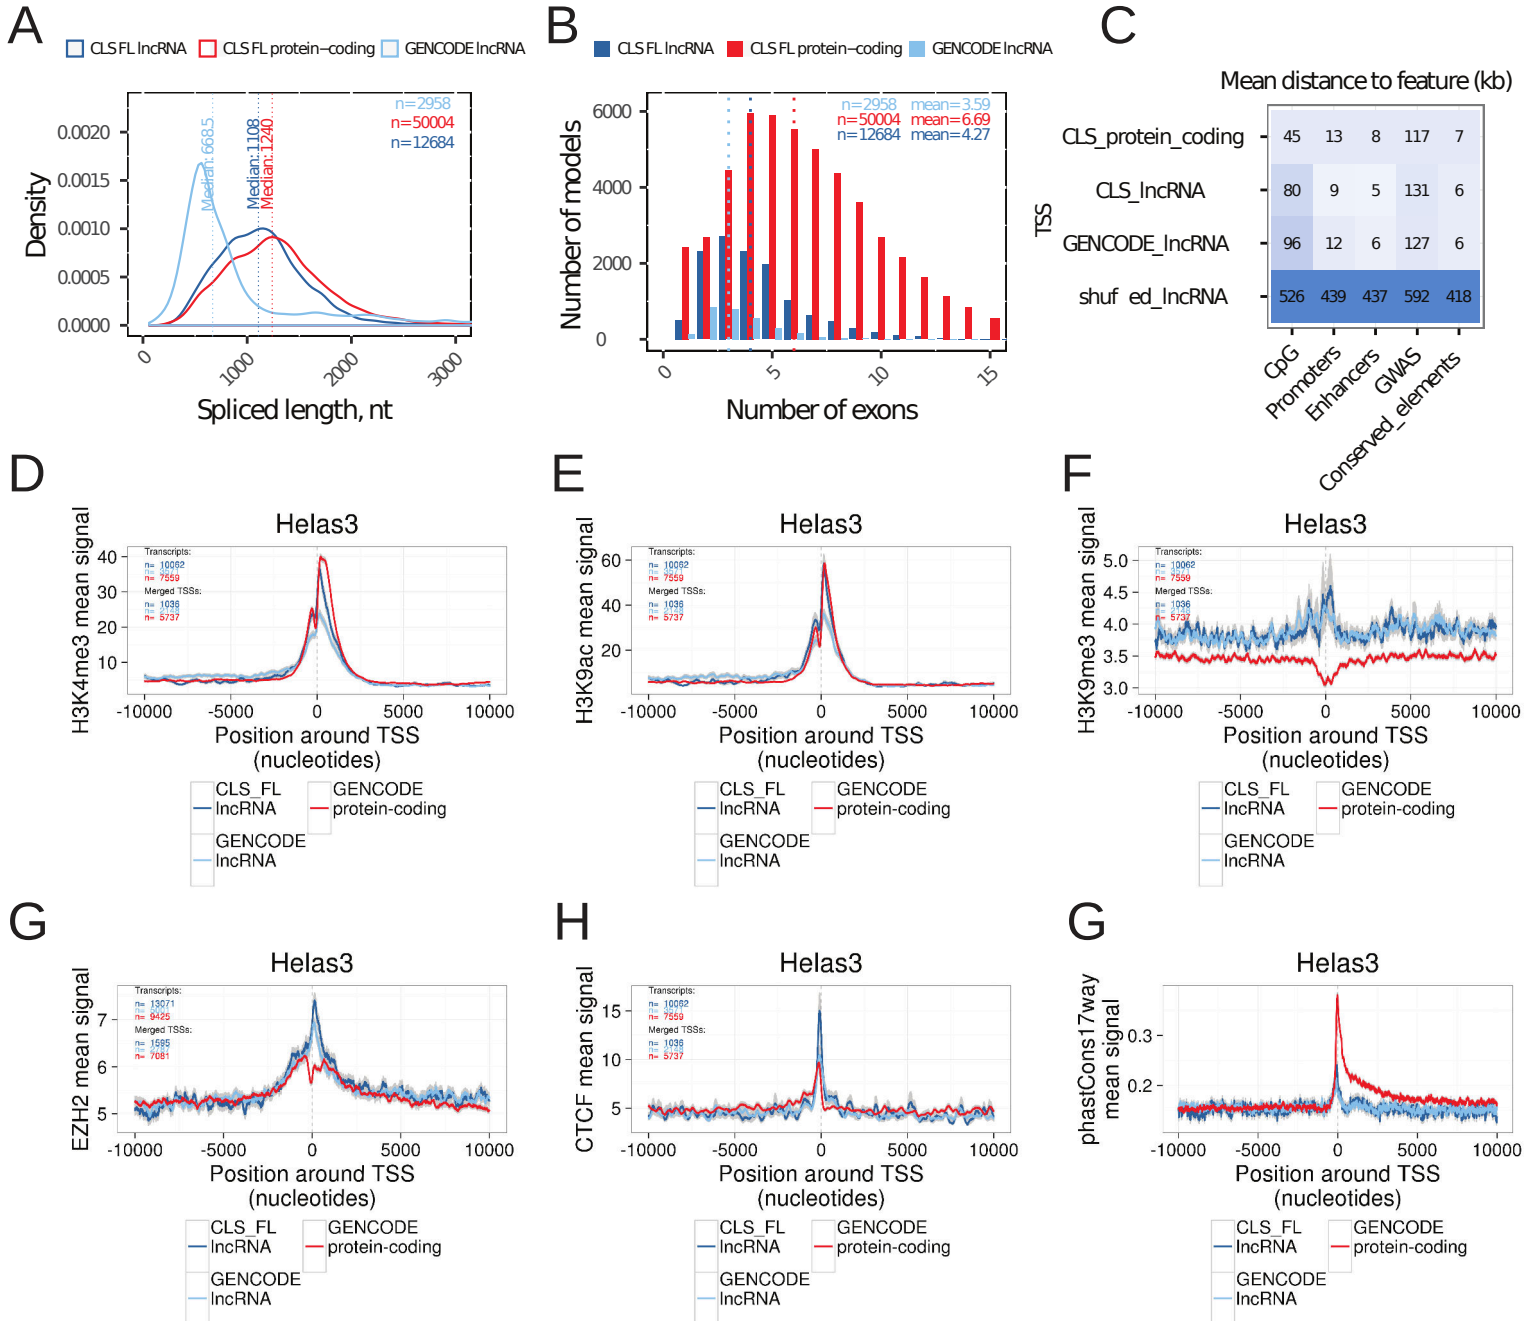

**Figure 6**

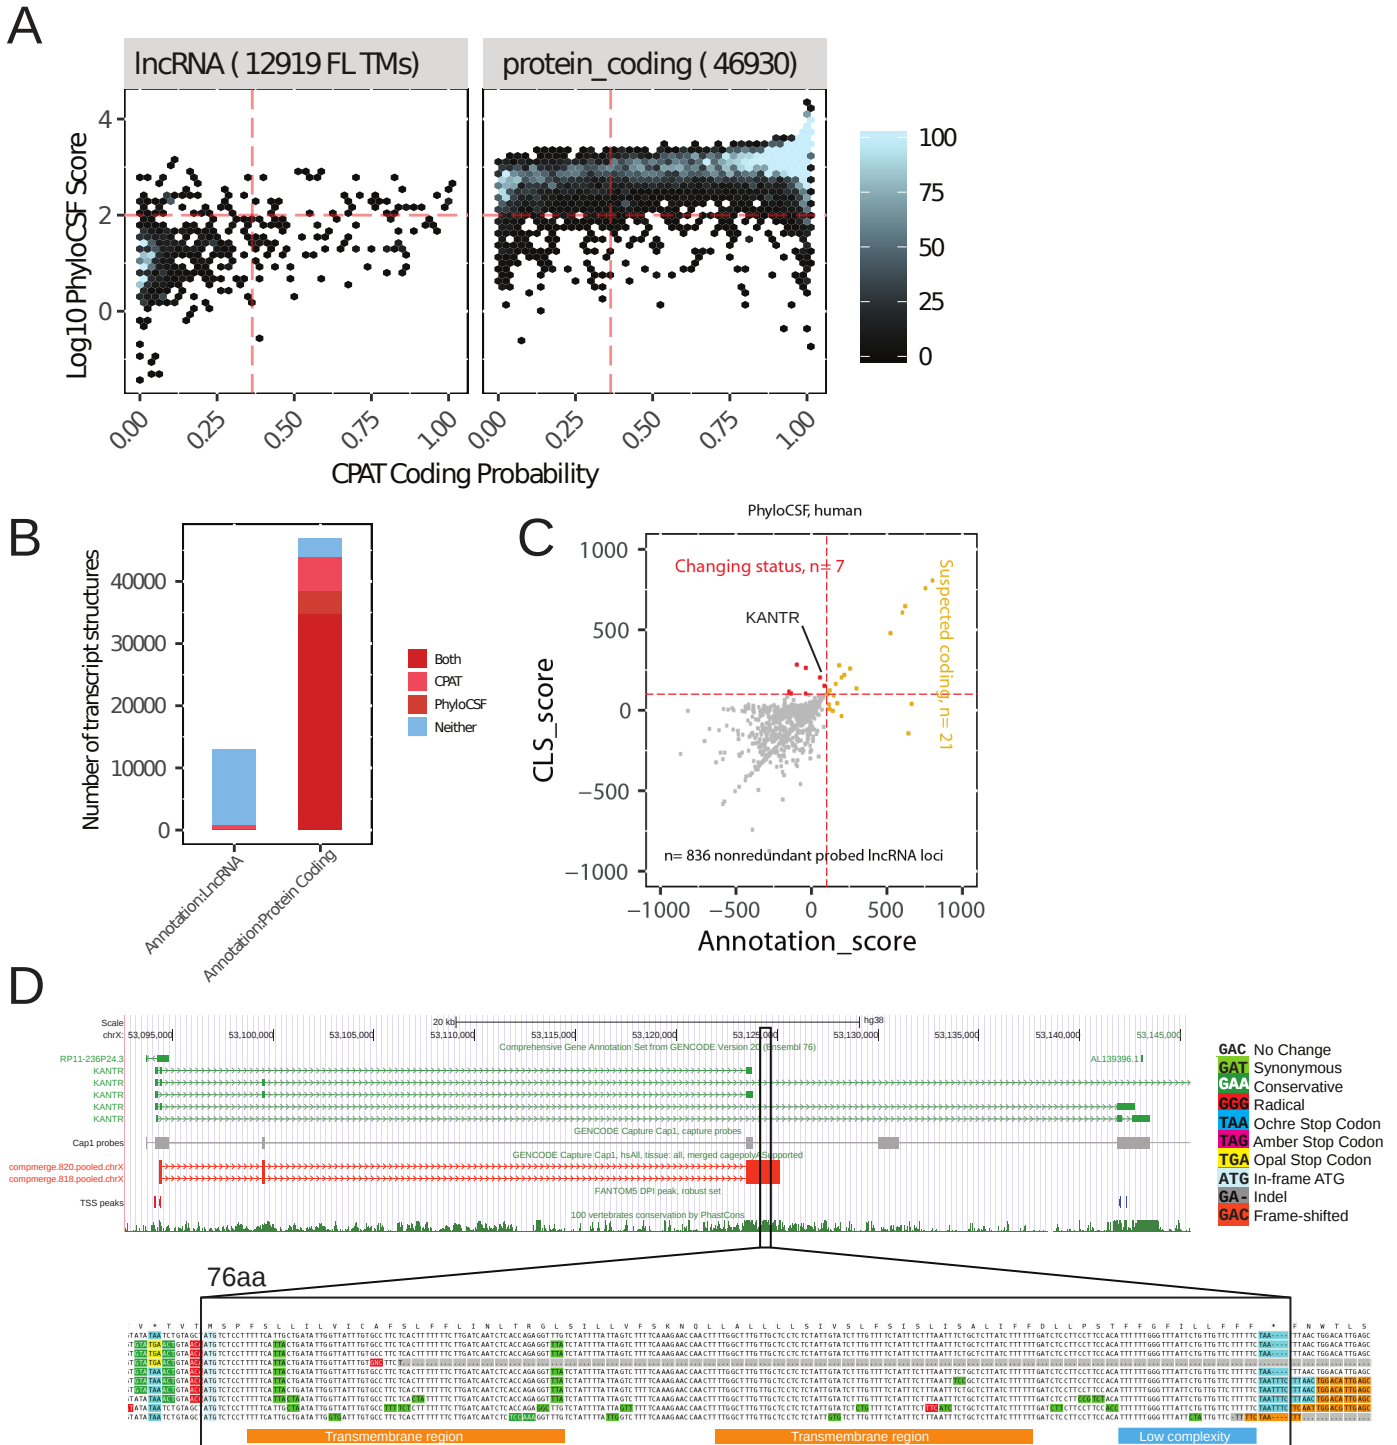

LINE1 L1ME3F
